# Supplementary material for: Differential protective effects of red wine polyphenol extracts (RWEs) on colon carcinogenesis
Source: Royal Society of Chemistry journal article supplement (doi:10.1039/c3fo60417a), 2014-01-01
Supplement: c3fo60417a.pdf [file c3fo60417a.pdf]

Table I. Supplemental data

RWE study - ACF determination

Distal

| Control | 1 ACF   | 2 ACF | 3 ACF | 4 ACF | 5 ACF | ≥ 6 ACF | ≥ 4 ACF | Total | Colon (cm) | ACF/cm | ≥ 4 ACF/cm |      |
|---------|---------|-------|-------|-------|-------|---------|---------|-------|------------|--------|------------|------|
| 2       | 3       | 2     | 1     | 0     | 0     | 0       | 0       | 6     | 3.0        | 2.0    | 0.0        |      |
| 3       | 4       | 1     | 1     | 0     | 0     | 0       | 0       | 6     | 3.0        | 2.0    | 0.0        |      |
| 4       | 3       | 2     | 2     | 0     | 0     | 0       | 0       | 7     | 3.0        | 2.3    | 0.0        |      |
| 6       | 6       | 2     | 2     | 0     | 1     | 1       | 2       | 12    | 3.0        | 4.0    | 0.7        |      |
| 7       | 6       | 10    | 3     | 1     | 3     | 0       | 4       | 23    | 4.5        | 5.1    | 0.9        |      |
| 8       | 9       | 7     | 5     | 4     | 1     | 0       | 5       | 26    | 3.0        | 8.7    | 1.7        |      |
| Control | Average |       |       |       |       |         |         | 1,8   | 13,3       | 3,3    | 4,0        | 0,54 |
|         | SD      |       |       |       |       |         |         | 2,2   | 9,0        | 0,6    | 2,6        | 0,7  |
|         | SEM     |       |       |       |       |         |         | 0,9   | 3,7        | 0,3    | 1,1        | 0,3  |

| RWE | 1 ACF   | 2 ACF | 3 ACF | 4 ACF | 5 ACF | ≥ 6 ACF | ≥ 4 ACF | Total | Colon (cm) | ACF/cm | ≥ 4 ACF/cm |      |
|-----|---------|-------|-------|-------|-------|---------|---------|-------|------------|--------|------------|------|
| 2   | 2       | 2     | 2     | 1     | 0     | 0       | 1       | 7     | 3.0        | 2.3    | 0.3        |      |
| 3   | 8       | 2     | 1     | 1     | 0     | 0       | 0       | 11    | 3.0        | 3.7    | 0.0        |      |
| 4   | 3       | 7     | 2     | 2     | 0     | 0       | 2       | 14    | 4.0        | 3.5    | 0.5        |      |
| 6   | 4       | 3     | 2     | 0     | 0     | 0       | 0       | 9     | 4.0        | 2.3    | 0.0        |      |
| 7   | 3       | 7     | 1     | 0     | 1     | 0       | 1       | 12    | 3.5        | 3.4    | 0.3        |      |
| 8   | 3       | 1     | 0     | 2     | 0     | 0       | 2       | 6     | 4.5        | 1.3    | 0.4        |      |
| 9   | 3       | 2     | 5     | 0     | 1     | 3       | 4       | 14    | 4.0        | 3.5    | 1.0        |      |
| RWE | Average |       |       |       |       |         |         | 1,4   | 10,4       | 3,7    | 2,9        | 0,37 |
|     | SD      |       |       |       |       |         |         | 1,4   | 3,2        | 0,6    | 0,9        | 0,3  |
|     | SEM     |       |       |       |       |         |         | 0,5   | 1,2        | 0,2    | 0,3        | 0,1  |

Mid-Distal

| Control | 1 ACF   | 2 ACF | 3 ACF | 4 ACF | 5 ACF | ≥ 6 ACF | ≥ 4 ACF | Total | Colon (cm) | ACF/cm | ≥ 4 ACF/cm |     |
|---------|---------|-------|-------|-------|-------|---------|---------|-------|------------|--------|------------|-----|
| 2       | 5       | 1     | 1     | 0     | 0     | 0       | 0       | 7     | 3.5        | 2.0    | 0.0        |     |
| 3       | 2       | 4     | 2     | 1     | 1     | 0       | 2       | 10    | 4.0        | 2.5    | 0.5        |     |
| 4       | 2       | 3     | 1     | 1     | 0     | 0       | 1       | 7     | 3.5        | 2.0    | 0.3        |     |
| 6       | 2       | 7     | 1     | 1     | 0     | 0       | 1       | 11    | 3.0        | 3.7    | 0.3        |     |
| 7       | 7       | 1     | 6     | 3     | 2     | 0       | 5       | 19    | 4.5        | 4.2    | 1.1        |     |
| 8       | 5       | 5     | 3     | 1     | 0     | 2       | 3       | 16    | 2.5        | 6.4    | 1.2        |     |
| Control | Average |       |       |       |       |         |         | 2,0   | 11,7       | 3,5    | 3,5        | 0,6 |
|         | SD      |       |       |       |       |         |         | 1,8   | 4,9        | 0,7    | 1,7        | 0,5 |
|         | SEM     |       |       |       |       |         |         | 0,7   | 2,0        | 0,3    | 0,7        | 0,2 |

| RWE | 1 ACF   | 2 ACF | 3 ACF | 4 ACF | 5 ACF | ≥ 6 ACF | ≥ 4 ACF | Total | Colon (cm) | ACF/cm | ≥ 4 ACF/cm |     |
|-----|---------|-------|-------|-------|-------|---------|---------|-------|------------|--------|------------|-----|
| 2   | 2       | 1     | 1     | 0     | 0     | 0       | 0       | 4     | 3.0        | 1.3    | 0.0        |     |
| 3   | 4       | 7     | 4     | 4     | 0     | 0       | 0       | 15    | 4.0        | 3.8    | 0.0        |     |
| 4   | 7       | 7     | 5     | 1     | 0     | 0       | 1       | 20    | 4.0        | 5.0    | 0.3        |     |
| 6   | 4       | 5     | 4     | 1     | 0     | 0       | 1       | 14    | 4.0        | 3.5    | 0.3        |     |
| 7   | 10      | 5     | 3     | 2     | 1     | 0       | 3       | 21    | 3.5        | 6      | 0.9        |     |
| 8   | 3       | 5     | 2     | 1     | 1     | 1       | 3       | 13    | 4.5        | 2.9    | 0.7        |     |
| 9   | 5       | 0     | 5     | 0     | 1     | 0       | 1       | 11    | 4.0        | 2.8    | 0.3        |     |
| RWE | Average |       |       |       |       |         |         | 1,3   | 14,0       | 3,9    | 3,6        | 0,3 |
|     | SD      |       |       |       |       |         |         | 1,3   | 5,7        | 0,5    | 1,5        | 0,3 |
|     | SEM     |       |       |       |       |         |         | 0,5   | 2,2        | 0,2    | 0,6        | 0,1 |

Proximal

| Control | 1 ACF   | 2 ACF | 3 ACF | 4 ACF | 5 ACF | ≥ 6 ACF | ≥ 4 ACF | Total | Colon (cm) | ACF/cm | ≥ 4 ACF/cm |     |
|---------|---------|-------|-------|-------|-------|---------|---------|-------|------------|--------|------------|-----|
| 2       | 2       | 1     | 1     | 0     | 0     | 0       | 0       | 4     | 4.0        | 1.0    | 0.0        |     |
| 3       | 2       | 0     | 0     | 0     | 0     | 0       | 0       | 2     | 3.0        | 0.7    | 0.0        |     |
| 4       | 0       | 1     | 0     | 1     | 0     | 0       | 1       | 2     | 1.5        | 1.3    | 0.7        |     |
| 6       | 3       | 3     | 2     | 1     | 0     | 0       | 1       | 9     | 4.5        | 2.0    | 0.2        |     |
| 7       | 2       | 2     | 0     | 0     | 0     | 0       | 0       | 4     | 4.0        | 1      | 0.0        |     |
| 8       | 0       | 1     | 0     | 0     | 0     | 0       | 0       | 1     | 0.5        | 2.0    | 0.0        |     |
| Control | Average |       |       |       |       |         |         | 0,3   | 3,7        | 2,9    | 1,3        | 0,1 |
|         | SD      |       |       |       |       |         |         | 0,5   | 2,9        | 1,6    | 0,6        | 0,3 |
|         | SEM     |       |       |       |       |         |         | 0,2   | 1,2        | 0,7    | 0,2        | 0,1 |

| RWE | 1 ACF   | 2 ACF | 3 ACF | 4 ACF | 5 ACF | ≥ 6 ACF | ≥ 4 ACF | Total | Colon (cm) | ACF/cm | ≥ 4 ACF/cm |     |
|-----|---------|-------|-------|-------|-------|---------|---------|-------|------------|--------|------------|-----|
| 2   | 1       | 1     | 0     | 0     | 0     | 0       | 0       | 2     | 1.0        | 2.0    | 0.0        |     |
| 3   | 2       | 4     | 1     | 0     | 0     | 0       | 0       | 7     | 3.5        | 2.0    | 0.0        |     |
| 4   | 0       | 1     | 1     | 0     | 0     | 0       | 0       | 2     | 3.0        | 0.7    | 0.0        |     |
| 6   | 1       | 3     | 3     | 0     | 0     | 0       | 0       | 7     | 4.0        | 1.8    | 0.0        |     |
| 7   | 3       | 0     | 1     | 0     | 0     | 0       | 0       | 4     | 3.5        | 1.1    | 0.0        |     |
| 8   | 3       | 2     | 1     | 0     | 0     | 0       | 0       | 6     | 3.0        | 2.0    | 0.0        |     |
| 9   | 1       | 2     | 2     | 0     | 0     | 0       | 0       | 5     | 2.5        | 2.0    | 0.0        |     |
| RWE | Average |       |       |       |       |         |         | 0,0   | 4,7        | 2,9    | 1,7        | 0,0 |
|     | SD      |       |       |       |       |         |         | 0,0   | 2,1        | 1,0    | 0,5        | 0,0 |
|     | SEM     |       |       |       |       |         |         | 0,0   | 0,8        | 0,4    | 0,2        | 0,0 |
